# Supplementary material for: A germline variant of human IgG1+ B cell receptor represses colorectal tumorigenesis and progression by shaping the tumor microenvironment
Source: Research Square preprint supplement (doi:10.21203/rs.3.rs-151780/v1), 2021-01-27
Supplement: Supplementary file 1 [file 6bafae8c337baa1e8e67c72f.pdf]

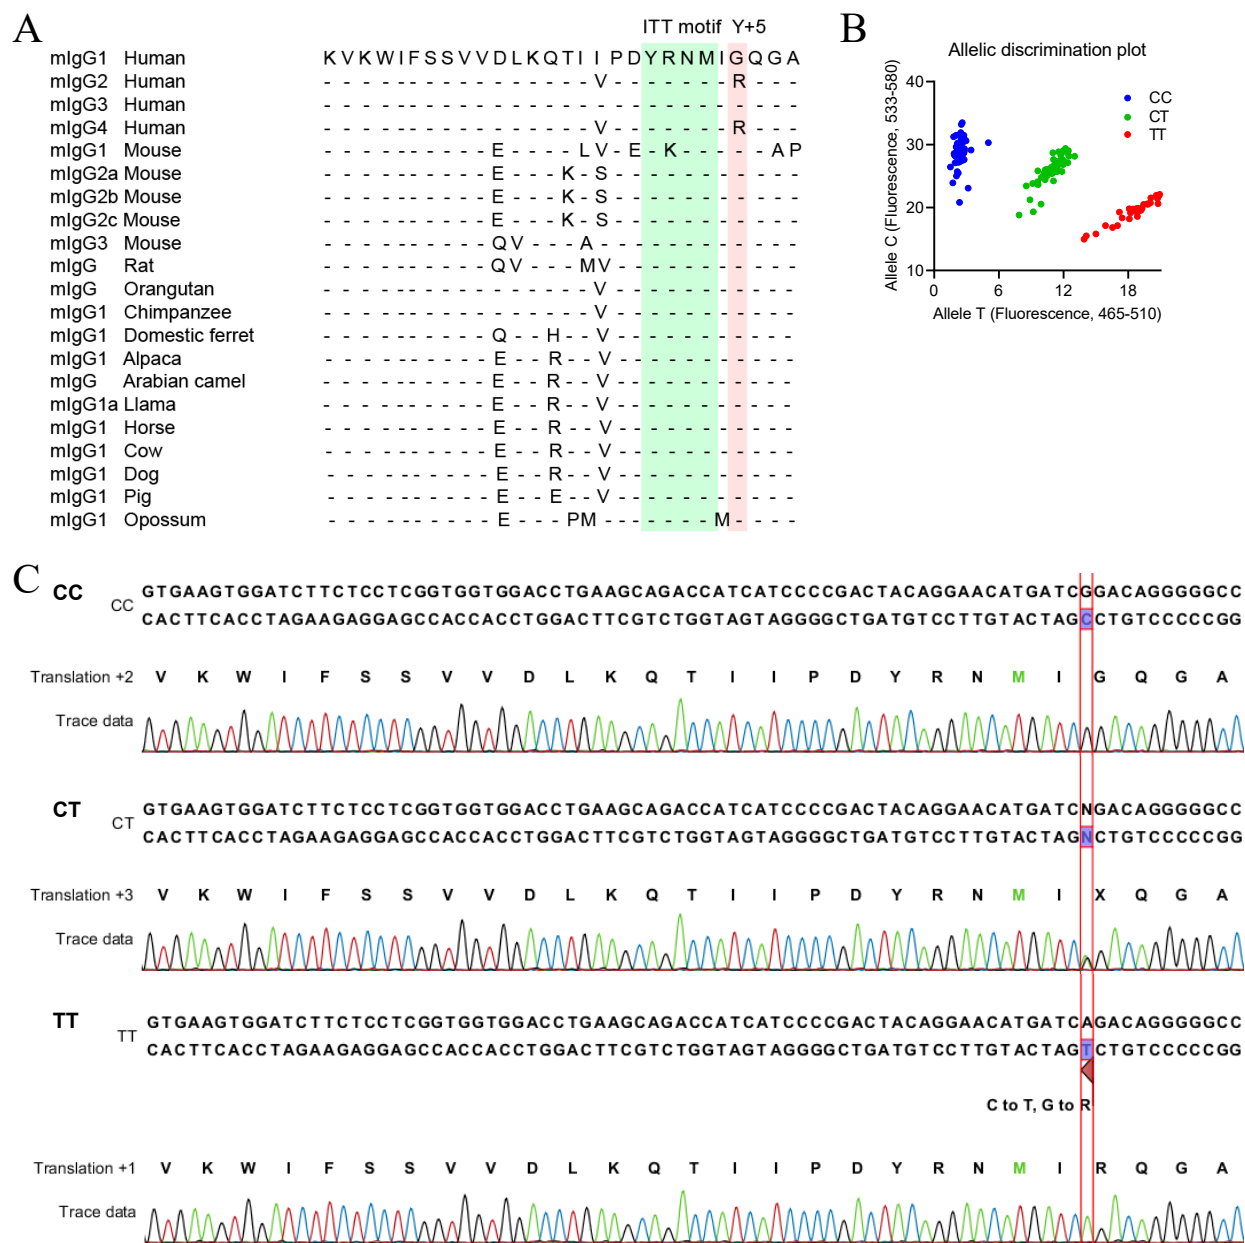

# Extended Data Fig. 1. The conserved tail sequence of mIgG and the identification of the hIgG1-G396R variant

(A) Sequences of the conserved tail of membrane-bound IgG in different species. (B) The distribution of three genotypes, including hIgG1-G396R homozygotes, heterozygotes and WT, detected by TaqMan-probe based genotyping. (C) The aligned target sequences of WT, hIgG1-G396R heterozygote and homozygote. The C/T polymorphism are highlighted.
