# Supplementary material for: A germline variant of human IgG1+ B cell receptor represses colorectal tumorigenesis and progression by shaping the tumor microenvironment
Source: Research Square preprint supplement (doi:10.21203/rs.3.rs-151780/v1), 2021-01-27
Supplement: Supplementary file 2 [file ac97e04577d7686392681c5f.pdf]

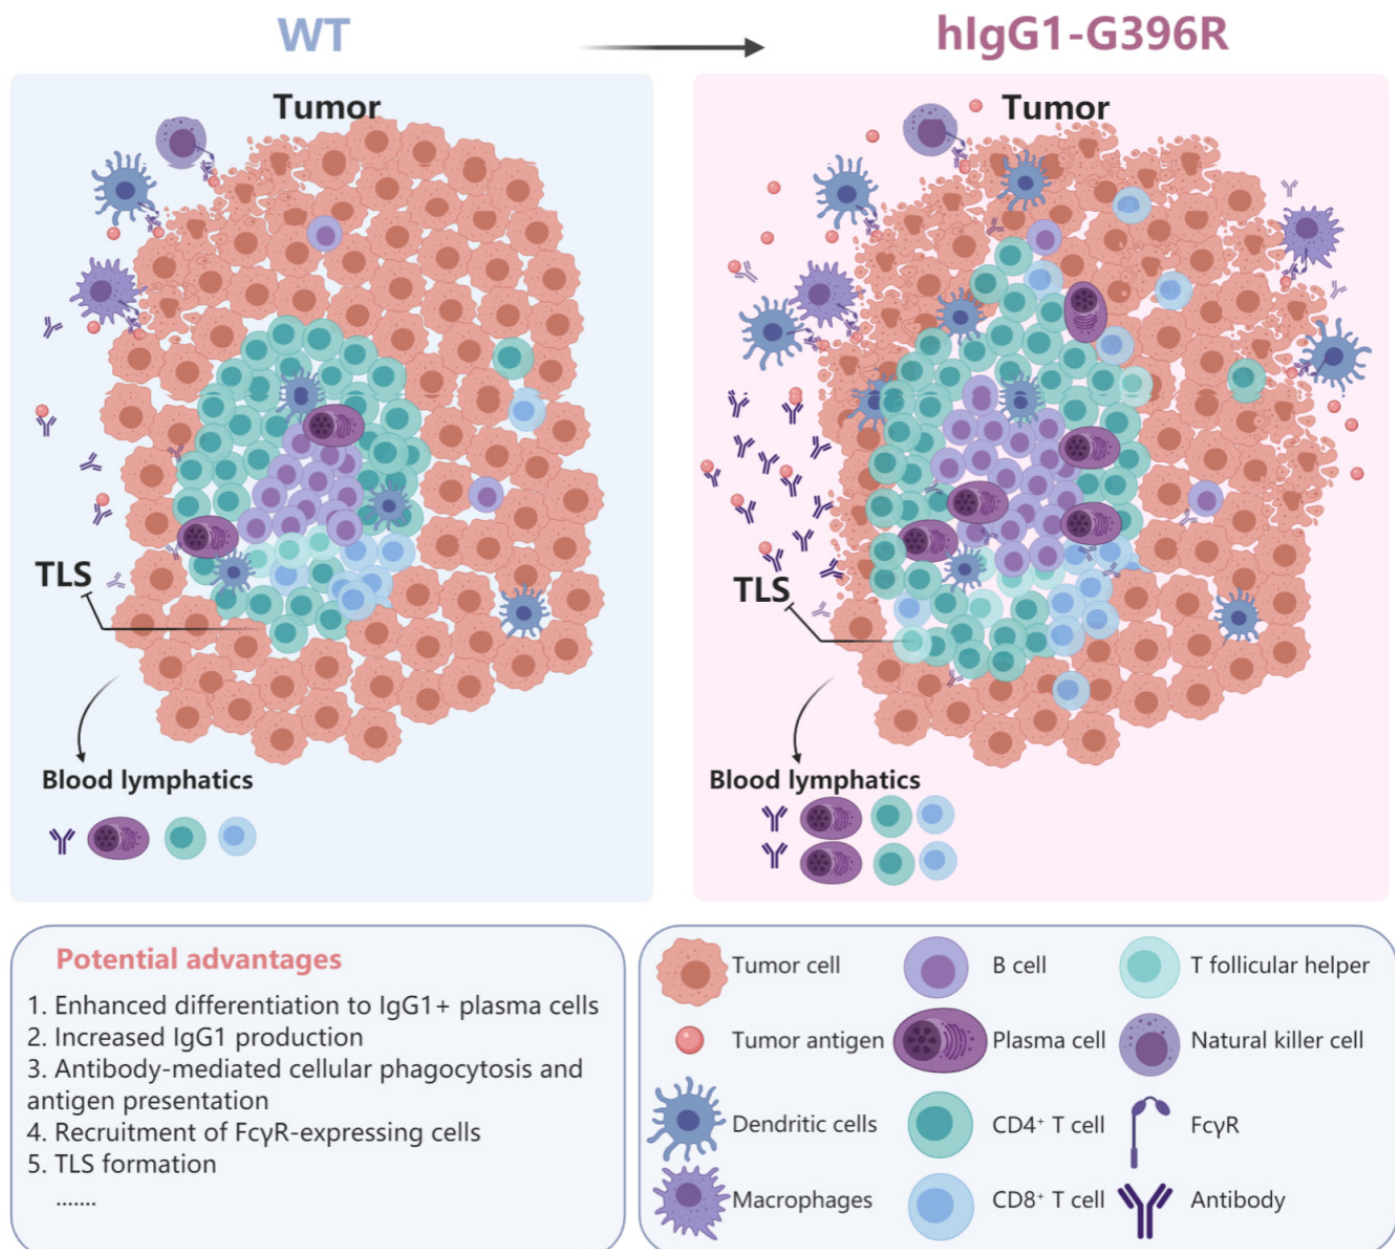

93 **Extended Data Fig. 9. The mechanical model indicates the altered TME of hIgG1-G396R**

94 Created in BioRender.com.
