# Supplementary material for: A germline variant of human IgG1+ B cell receptor represses colorectal tumorigenesis and progression by shaping the tumor microenvironment
Source: Research Square preprint supplement (doi:10.21203/rs.3.rs-151780/v1), 2021-01-27
Supplement: Supplementary file 4 [file c937d399a8a3b80d8f012215.pdf]

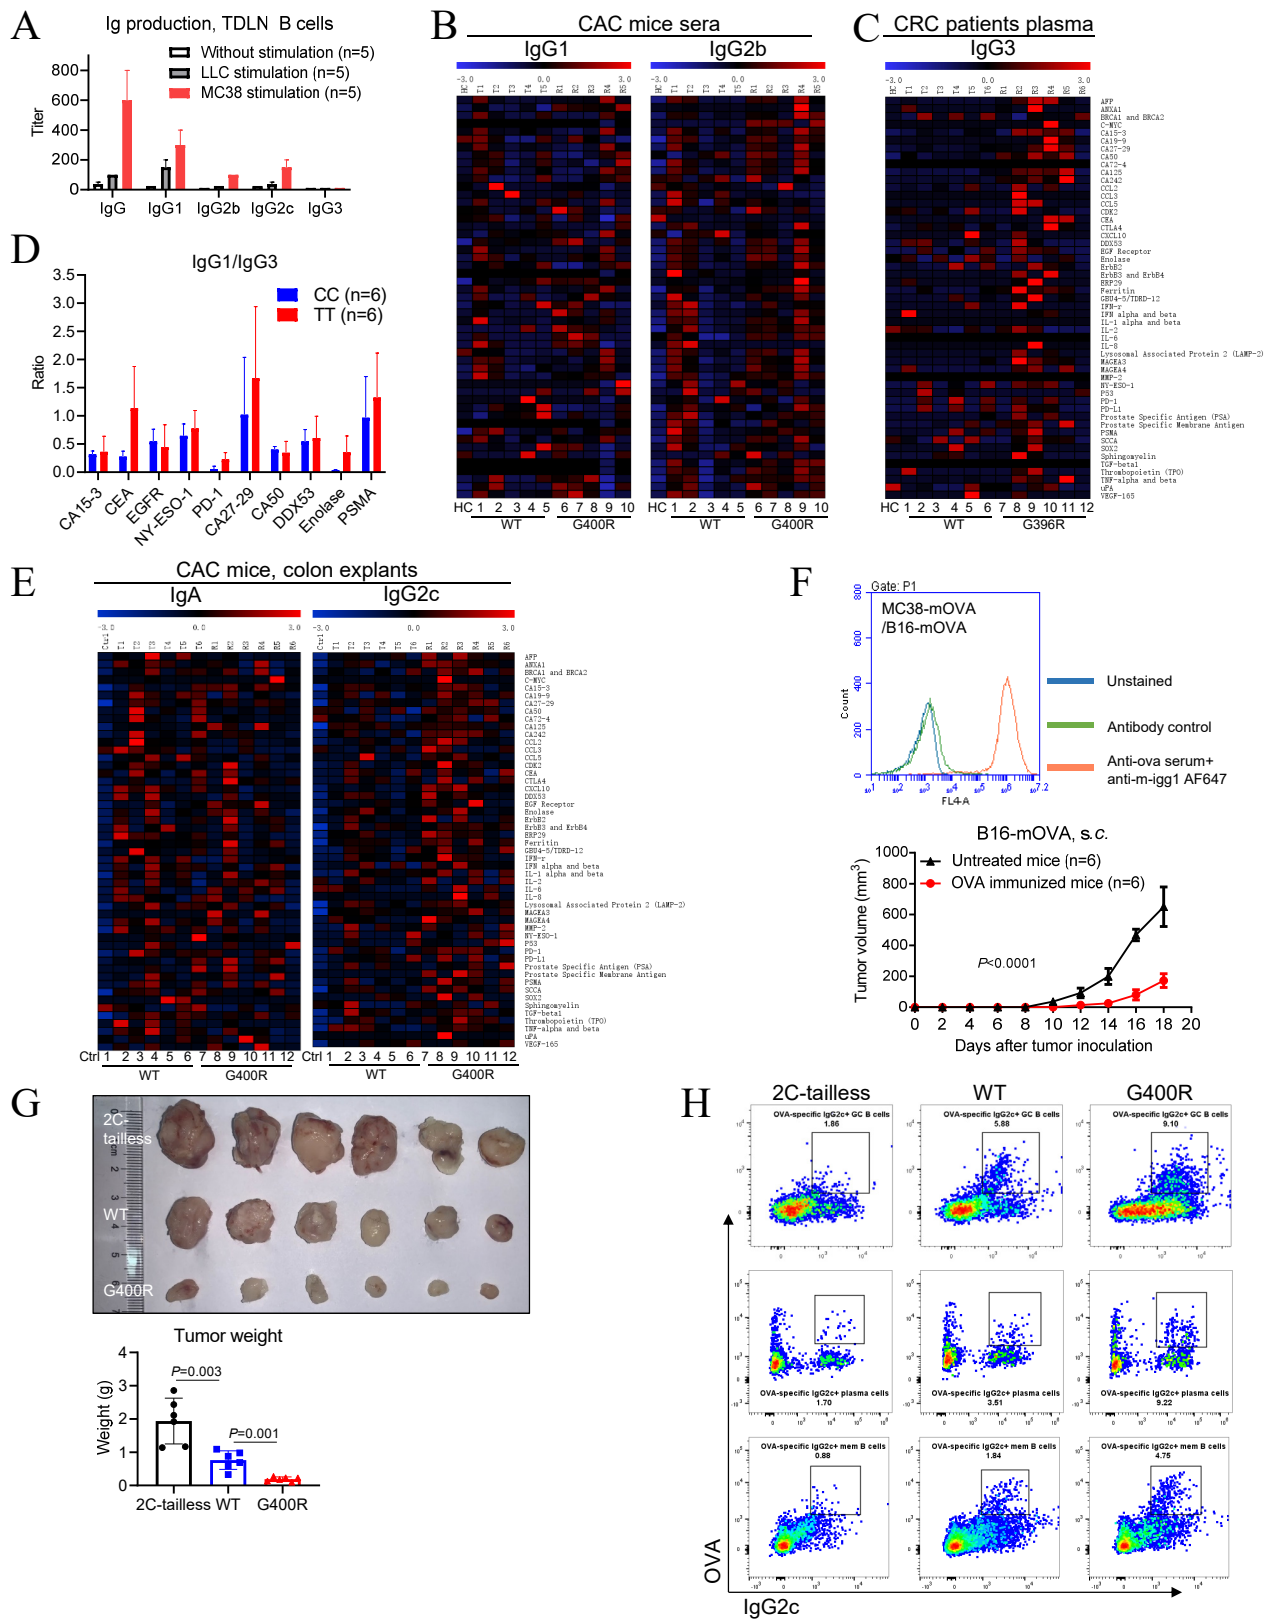

**Extended Data Fig. 5. Altered levels of tumor-specific antibody production and plasma cell differentiation occurring with both hIgG1-G396R and mIgG2c-G400R variant**

(A) Secretion of IgG subclasses by activated TDLN B cells in stimulation with cell medium, irradiated LLC cells or MC38 cells. (B) TAA microarray analyses of IgG1 and IgG2b in the sera from untreated mouse (n=1), CAC-induced WT mice (n=5) and mIgG2c-G400R mice (n=5). (C) TAA microarray analyses of IgG3 in the plasma samples of healthy donor (n=1), WT CRC patients (n=6) and hIgG1-G396R homozygous CRC patients (n=6). (D) The ratios of IgG1/IgG3 were evaluated based on the TAA microarray results. (E) TAA microarray analyses of IgA and IgG2c subclasses in the colon explants from WT CAC mice (n=6), mIgG2c-G400R CAC mice (n=6) and cell medium. (F) OVA expression in MC38-mOVA cells and B16-mOVA cells detected by flow cytometry. The growth curves of B16-mOVA tumor cells in untreated mice and OVA-immunized mice are shown. (G) The MC38-mOVA tumor size in mIgG2c-tailless, WT and mIgG2c-G400R mice. Tumor tissues were isolated and weighed after euthanasia. (H) Representative flow cytometry plots of OVA-specific IgG2c<sup>+</sup> GC B cells, plasma cells and memory B cells. OVA-specific IgG2c<sup>+</sup> GC B cells were gated from total B220<sup>+</sup> GL-7<sup>+</sup> GC B cells, OVA-specific IgG2c<sup>+</sup> memory B cells were gated from total B220<sup>+</sup> CD38<sup>+</sup> IgD<sup>-</sup> memory B cells, and OVA-specific IgG2c<sup>+</sup> plasma cells were gated from total B220<sup>low</sup> CD138<sup>high</sup> plasma cells. One of three representative experiments is shown (A, F, G, H). Statistical significance was determined using two-way ANOVA (F) and an unpaired two-tailed t-test (G). Mean± SEM.
